# Supplementary material for: Probiotic Consortium Confers Synergistic Anti-Inflammatory Effects in Inflammatory Disorders
Source: MDPI journal article supplement (doi:10.3390/nu16060790), 2024-03-11
Supplement: s1 [file s1]

# Probiotic Consortium Confers Synergistic Anti-inflammatory Effects in Inflammatory Disorders

Changhon Lee <sup>1,2,+</sup>, Seung Won Kim <sup>1,+</sup>, Ravi Verma <sup>3,4</sup>, Jaegyun Noh <sup>1</sup>, John Chulhoon Park <sup>1</sup>, Sunhee Park <sup>3,5</sup>, Haena Lee <sup>1</sup>, Hye Eun Park <sup>1</sup>, Chan Johng Kim <sup>1,6</sup>, Seohyun Byun <sup>1,7</sup>, Haeun Ko <sup>1</sup>, Seungyeon Choi <sup>3</sup>, Inhae Kim <sup>3</sup>, Soomin Jeon <sup>8</sup>, Junglyoul Lee <sup>8,\*</sup> and Sin-Hyeog Im <sup>1,3,9,\*</sup>

<sup>1</sup> Department of Life Sciences, POSTECH Biotech Center, Pohang University of Science and Technology (POSTECH), Pohang, 37673, Republic of Korea

<sup>2</sup> Current address: Department of Immunology, Blavatnik Institute, Harvard Medical School, Boston, MA, 02115, USA

<sup>3</sup> ImmunoBiome Inc, 77 Cheongam-Ro, Nam-Gu, Pohang, 37673, Republic of Korea

<sup>4</sup> Current address: School of Biotechnology, Jawaharlal Nehru University, New Delhi 110067, India

<sup>5</sup> Current address: Natural Product Informatics Research Center, Korea Institute of Science and Technology (KIST), Gangneung, 25451, Republic of Korea

<sup>6</sup> Current address: Department of Biochemistry and Institute for Protein Design, University of Washington, Seattle, WA, 98195, USA

<sup>7</sup> Current address: Celltrion, Inc, 22 Academy-ro 51beon-gil, Yeonsu-gu, Incheon, 22014, Republic of Korea

<sup>8</sup> hy Co. Ltd, 22 Giheungdanji-Ro 24 beon-gil, Giheung-Gu, Yongin, 17086, Republic of Korea

<sup>9</sup> Institute for Convergence Research and Education, Yonsei University, Seoul, 03722, Republic of Korea

+ Equal contributors

\* Correspondence: junyeop0315@naver.com (J.L.); iimsh@postech.ac.kr (S.H.I)

## Supplementary Figures

### Figure S1

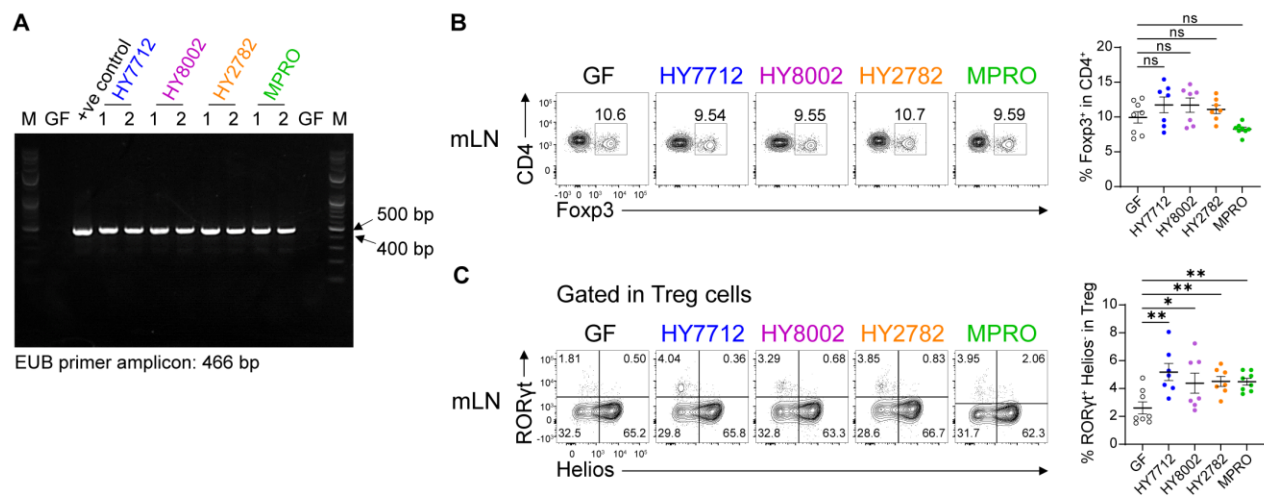

**Figure S1.** Effect of bacteria treatment on Treg cells in the mLN. **(A)** PCR analysis was conducted to confirm the colonization of germ-free (GF) mice after treatment with indicated bacterial strains. DNAs isolated from GF mice colonized with respective bacteria were amplified using EUB universal primers and loaded onto an agarose gel with a marker for analysis. **(B)** Representative flow cytometry plots and frequencies of Foxp3<sup>+</sup> cells within the CD4<sup>+</sup> T cell population in the lamina propria of mesenteric lymph node (mLN) of the indicated mice. **(C)** Representative flow cytometry plots and frequencies of RORγt<sup>+</sup>Helios<sup>-</sup> cells within the Treg cell population in the mLN of the indicated mice. The graphs show the mean ± SEM. **(B, C)** \**p* < 0.05, \*\**p* < 0.01 (Student's *t* test). ns: not significant. Data pooled from two to three independent experiments.

Figure S2

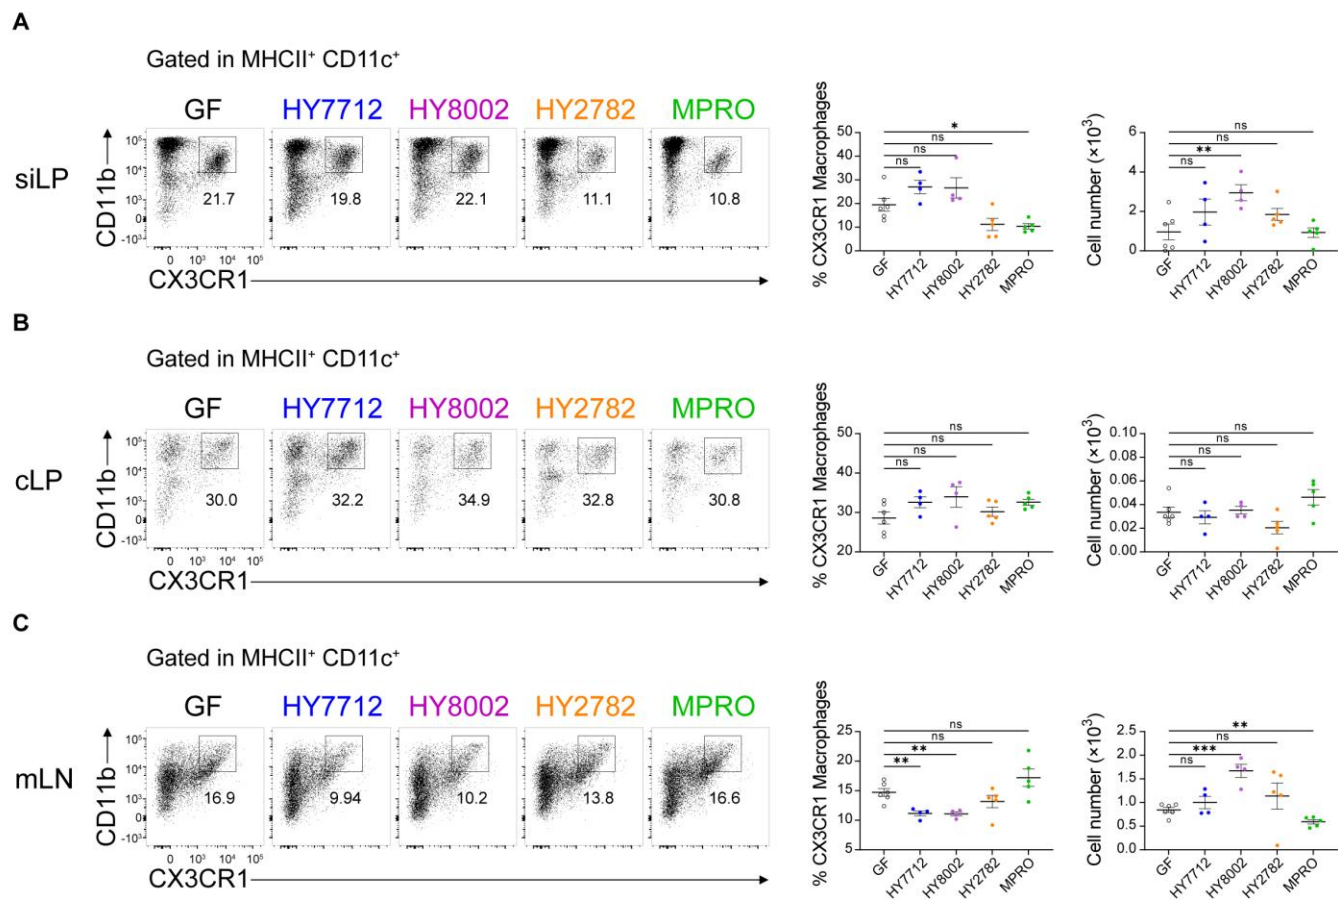

**Figure S2.** Effect of bacteria treatment on CX3CR1<sup>+</sup> macrophages. GF C57BL/6 mice were colonized with HY7712, HY8002, HY2782, or MPRO for 3 weeks, and CX3CR1<sup>+</sup> macrophages within the MHCII<sup>+</sup> CD11c<sup>+</sup> cell population were analyzed by flow cytometry in the siLP (A), cLP (B) and mLN (C). All graphs show the mean  $\pm$  SEM. \* $p < 0.05$ , \*\* $p < 0.01$ , \*\*\* $p < 0.001$  (Student's  $t$  test). ns: not significant. Data pooled from two independent experiments.

Figure S3

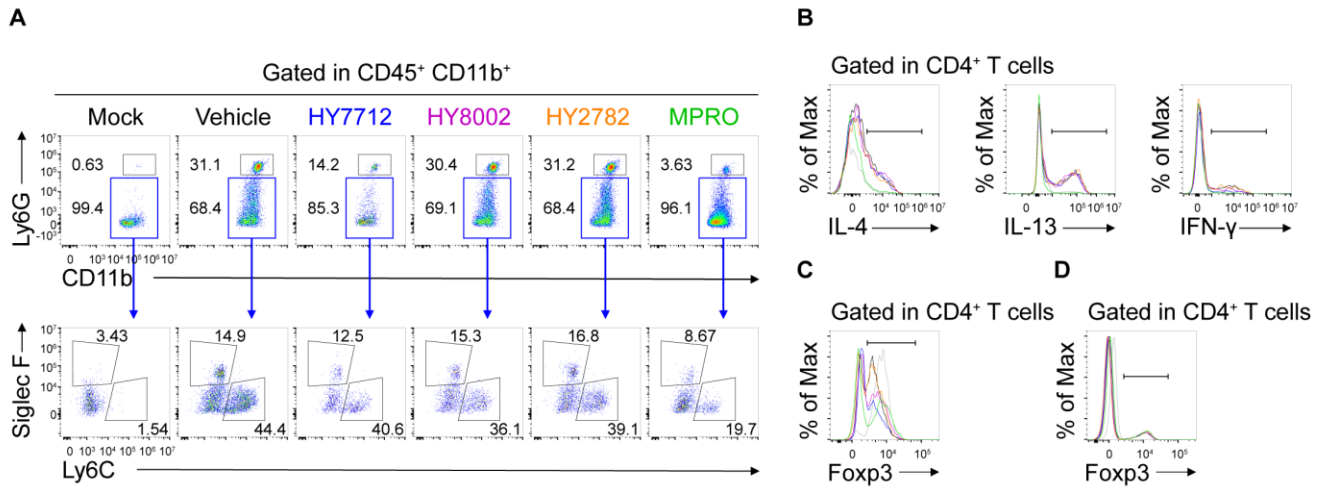

**Figure S3.** MPRO treatment ameliorates experimental AD by suppressing inflammatory immune responses. Cells were isolated from mice's ears or cervical draining lymph nodes treated with vehicle, HY7712, HY8002, HY2782, or MPRO after 7 weeks of AD induction. **(A)** Representative flow cytometry plots of neutrophil, eosinophil, or monocyte infiltration at inflamed ears of indicated mice. **(B)** Representative flow cytometry plots of IL-4<sup>+</sup>, IL-13<sup>+</sup>, or IFN- $\gamma$ <sup>+</sup> cells within the CD4<sup>+</sup> T cell population in the ears of indicated mice. Representative histograms of Foxp3<sup>+</sup> cells within the CD4<sup>+</sup> T cell population in the ears **(C)** and cervical draining lymph nodes **(D)** of indicated mice.

## Supplementary Tables

**Supplementary Table S1.** List of antibodies used in flow cytometry

| Target         | Conjugate   | Source        | #Catalog     | Clone           |
|----------------|-------------|---------------|--------------|-----------------|
| CD45           | BV605       | Biologend     | 103140       | 30-F11          |
| CD45.1         | APC         | Biologend     | 110714       | A20             |
| TCR $\beta$    | A488        | Biologend     | 109215       | H57-597         |
| TCR $\beta$    | APC         | Biologend     | 109212       | H57-597         |
| MHCII          | APC/Cy7     | Biologend     | 107628       | M5/114.15.2     |
| CD11b          | PE/Cy7      | Biologend     | 101216       | M1/70           |
| CD11b          | PerCP/Cy5.5 | TONBO         | 65-0112-U100 | M1/70           |
| B220           | FITC        | TONBO         | 35-0452-U100 | RA3-6B2         |
| CD4            | BUV395      | BD bioscience | 563790       | GK1.5           |
| CD4            | BV605       | Biologend     | 100548       | RM4-5           |
| CD8a           | APC         | TONBO         | 20-0081-U100 | 53-6.7          |
| CD8a           | PerCP/Cy5.5 | TONBO         | 65-0081-U100 | 53-6.7          |
| CD8a           | APC/Cy7     | TONBO         | 25-0081-U100 | 53-6.7          |
| CD8a           | BUV395      | BD bioscience | 563786       | 53-6.7          |
| CD11c          | FITC        | TONBO         | 35-0114-U100 | N418            |
| Ly6C           | BV510       | Biologend     | 128033       | HK1.4           |
| Ly6G           | APC         | Biologend     | 127613       | 1A8             |
| Siglec F       | PE          | BD Bioscience | 552126       | E50-2440        |
| CD103          | BV421       | Biologend     | 121422       | 2E7             |
| CX3CR1         | PE          | Biologend     | 149006       | SA011F11        |
| CD317          | APC         | Biologend     | 127016       | 927             |
| Nrp1           | PerCP/Cy5.5 | Biologend     | 145208       | 3E12            |
| CTLA-4         | BV421       | Biologend     | 106312       | UC10-4B9        |
| CD45RB         | PE          | BD Bioscience | 553101       | 16A             |
| Foxp3          | PE/Cy7      | Invitrogen    | 25-5773-82   | FJK-16s         |
| Foxp3          | FITC        | Invitrogen    | 11-5773-82   | FJK-16s         |
| T-bet          | PE/Cy7      | Invitrogen    | 25-5825-82   | eBio4B10 (4B10) |
| GATA-3         | BV421       | Biologend     | 653814       | 16E10A23        |
| ROR $\gamma$ t | PE          | Invitrogen    | 12-6981-82   | B2D             |
| Helios         | A488        | Biologend     | 137223       | 22F6            |
| IFN- $\gamma$  | PerCP/Cy5.5 | Biologend     | 505822       | XMG1.2          |
| IFN- $\gamma$  | PE          | Invitrogen    | 12-7311-82   | XMG1.2          |
| IFN- $\gamma$  | APC         | Invitrogen    | 17-7311-82   | XMG1.2          |
| IL-10          | BV421       | Biologend     | 505022       | JES5-16E3       |
| IL-13          | PerCP/eF710 | Invitrogen    | 46-7133-82   | eBio13A         |

Continued in next page.

**Supplementary Table S1.** List of antibodies used in flow cytometry

| Target | Conjugate | Source     | #Catalog   | Clone        |
|--------|-----------|------------|------------|--------------|
| IL-17A | APC       | Biolegend  | 506916     | TC11-18H10.1 |
| IL-17A | PE/Cy7    | Biolegend  | 506922     | TC11-18H10.1 |
| IL-17A | PE        | Biolegend  | 506904     | TC11-18H10.1 |
| IL-4   | PE        | Invitrogen | 12-7041-81 | 11B11        |
| IL-4   | PE/Cy7    | Invitrogen | 25-7041-82 | 11B11        |
| FVD    | eF506     | Invitrogen | 65-0866-18 |              |
| FVD    | eF780     | Invitrogen | 65-0865-18 |              |
